# Supplementary material for: WisecondorX: improved copy number detection for routine shallow whole-genome sequencing
Source: PubMed Central journal article supplement — Nucleic Acids Res. 2018 Dec 19;47(4):1605–14. doi: 10.1093/nar/gky1263 (PMC6393301; doi:10.1093/nar/gky1263), 2018-12-19
Supplement: gky1263_supplemental_files.pdf [file gky1263_supplemental_files.pdf]

# **WisecondorX: improved copy number detection for routine shallow whole-genome sequencing (supplementary tables and figures)**

|                                                                                                       |    |
|-------------------------------------------------------------------------------------------------------|----|
| Figure S1. <b>Schematic overview of the computational phase in the comparative study.</b> .....       | 1  |
| Figure S2. <b>Representation of the blacklists across the considered tools at 100 kb.</b> .....       | 1  |
| Figure S3. <b>Representation of the blacklists across the considered tools at 30 kb.</b> .....        | 2  |
| Figure S4. <b>Typical autosome-wide profiles for a healthy NIPT sample.</b> .....                     | 3  |
| Figure S5. <b>Typical autosome-wide profiles for gDNA samples without validated variations.</b> ..... | 4  |
| Figure S6. <b>Typical autosome-wide profiles for a trisomy 21 NIPT sample.</b> .....                  | 5  |
| Figure S7. <b>Typical autosome-wide profiles for gDNA samples with validated variations.</b> .....    | 6  |
| Figure S8. <b>Autosome-wide profile comparison of problematic sample gDNA-3.</b> .....                | 7  |
| Figure S9. <b>Claimed false positives by WISECONDOR.</b> .....                                        | 8  |
| Figure S10. <b>Autosome-wide comparison of problematic sample gDNA-12.</b> .....                      | 9  |
| Figure S11. <b>Segmentation comparison between WISECONDOR and WisecondorX.</b> .....                  | 10 |
| Figure S12. <b>Part of WisecondorX's genome-wide output for a fetus with monosomy X.</b> .....        | 10 |
| <br>                                                                                                  |    |
| Table S1. <b>Depth of coverage WGS tools selected for a comparative analysis.</b> .....               | 11 |
| Table S2. <b>Samples used in the comparative study.</b> .....                                         | 11 |
| Table S3. <b>Used case samples with validated aberrations.</b> .....                                  | 12 |

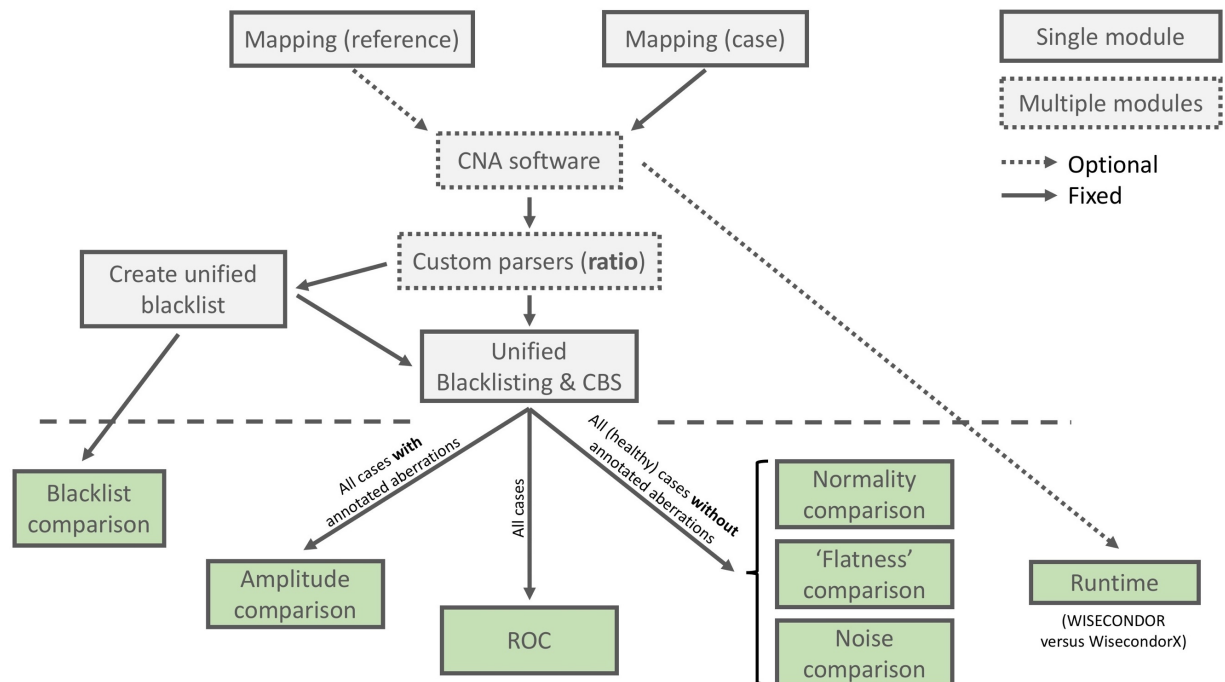

Figure S1. **Schematic overview of the computational phase in the comparative study.**

To avoid bias at any level, every sample is processed in an identical way. Finally, each case is assigned to a or multiple particular study component(s), being the part(s) for which it is most qualified.

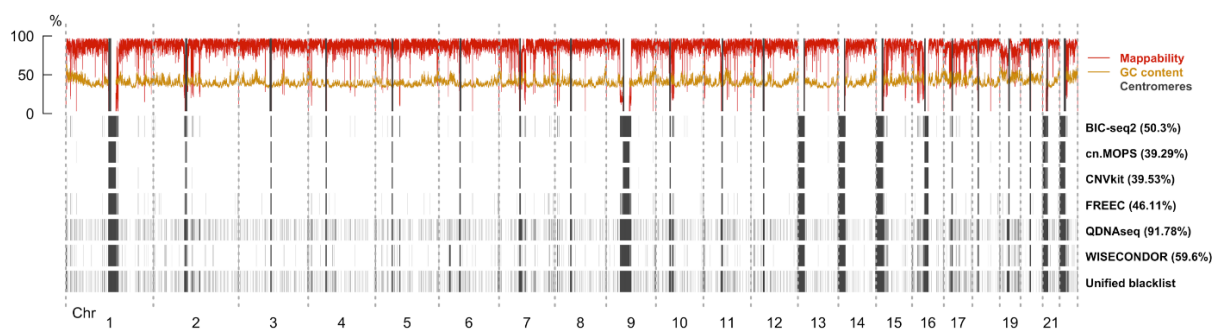

Figure S2. **Representation of the blacklists across the considered tools at 100 kb.**

Above, mappability, GC content and centromere locations are visualized. Blacklisted positions are shown by black bars, where opacity indicates width. Percentages show each tool's contribution to the unified blacklist, which by itself covers 16.04% of the human genome.

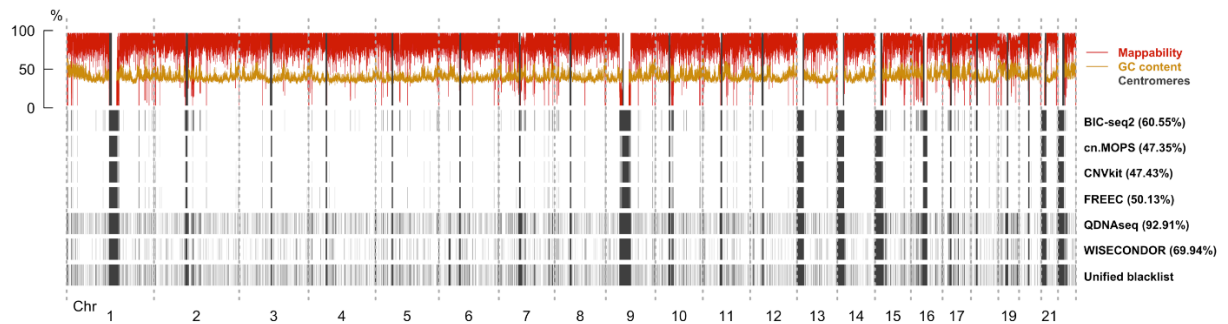

Figure S3. **Representation of the blacklists across the considered tools at 30 kb.**

Above, mappability, GC content and centromere locations are visualized. Blacklisted positions are shown by black bars, where opacity indicates width. Percentages show each tool's contribution to the unified blacklist, which by itself covers 13.94% of the human genome.

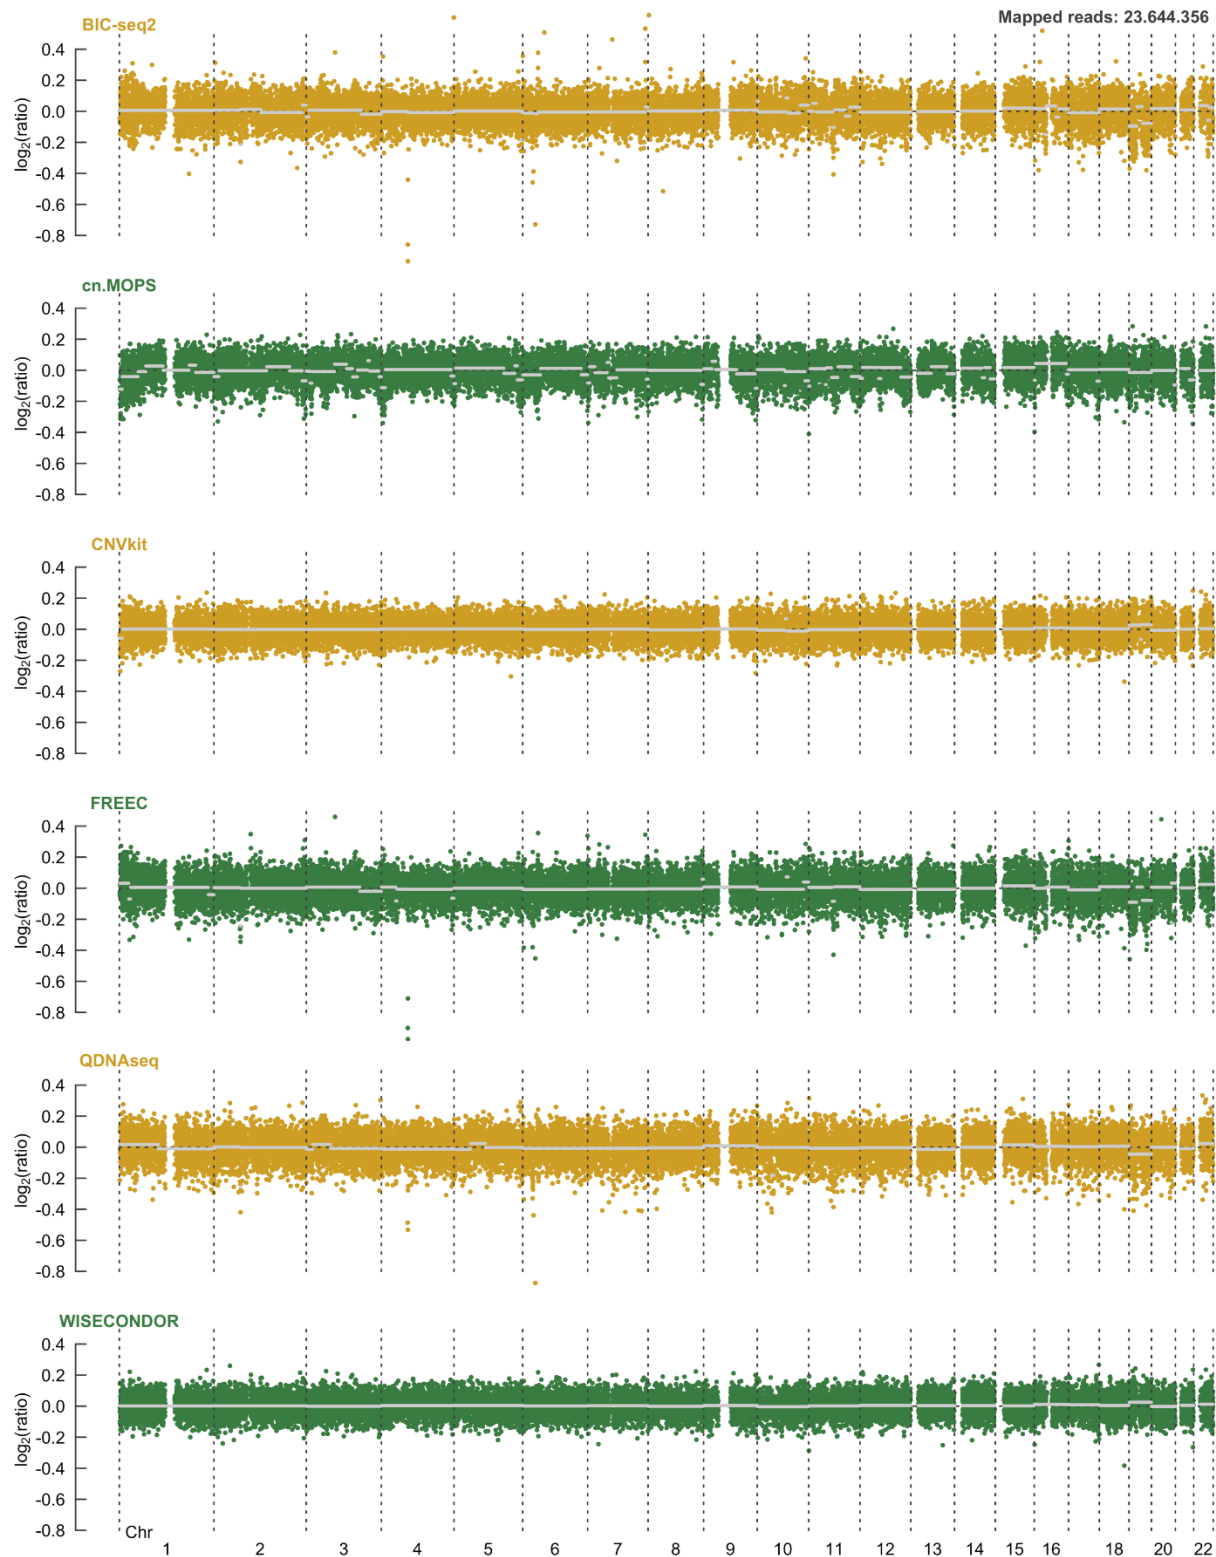

Figure S4. Typical autosome-wide profiles for a healthy NIPT sample. NIPT-1 is depicted.



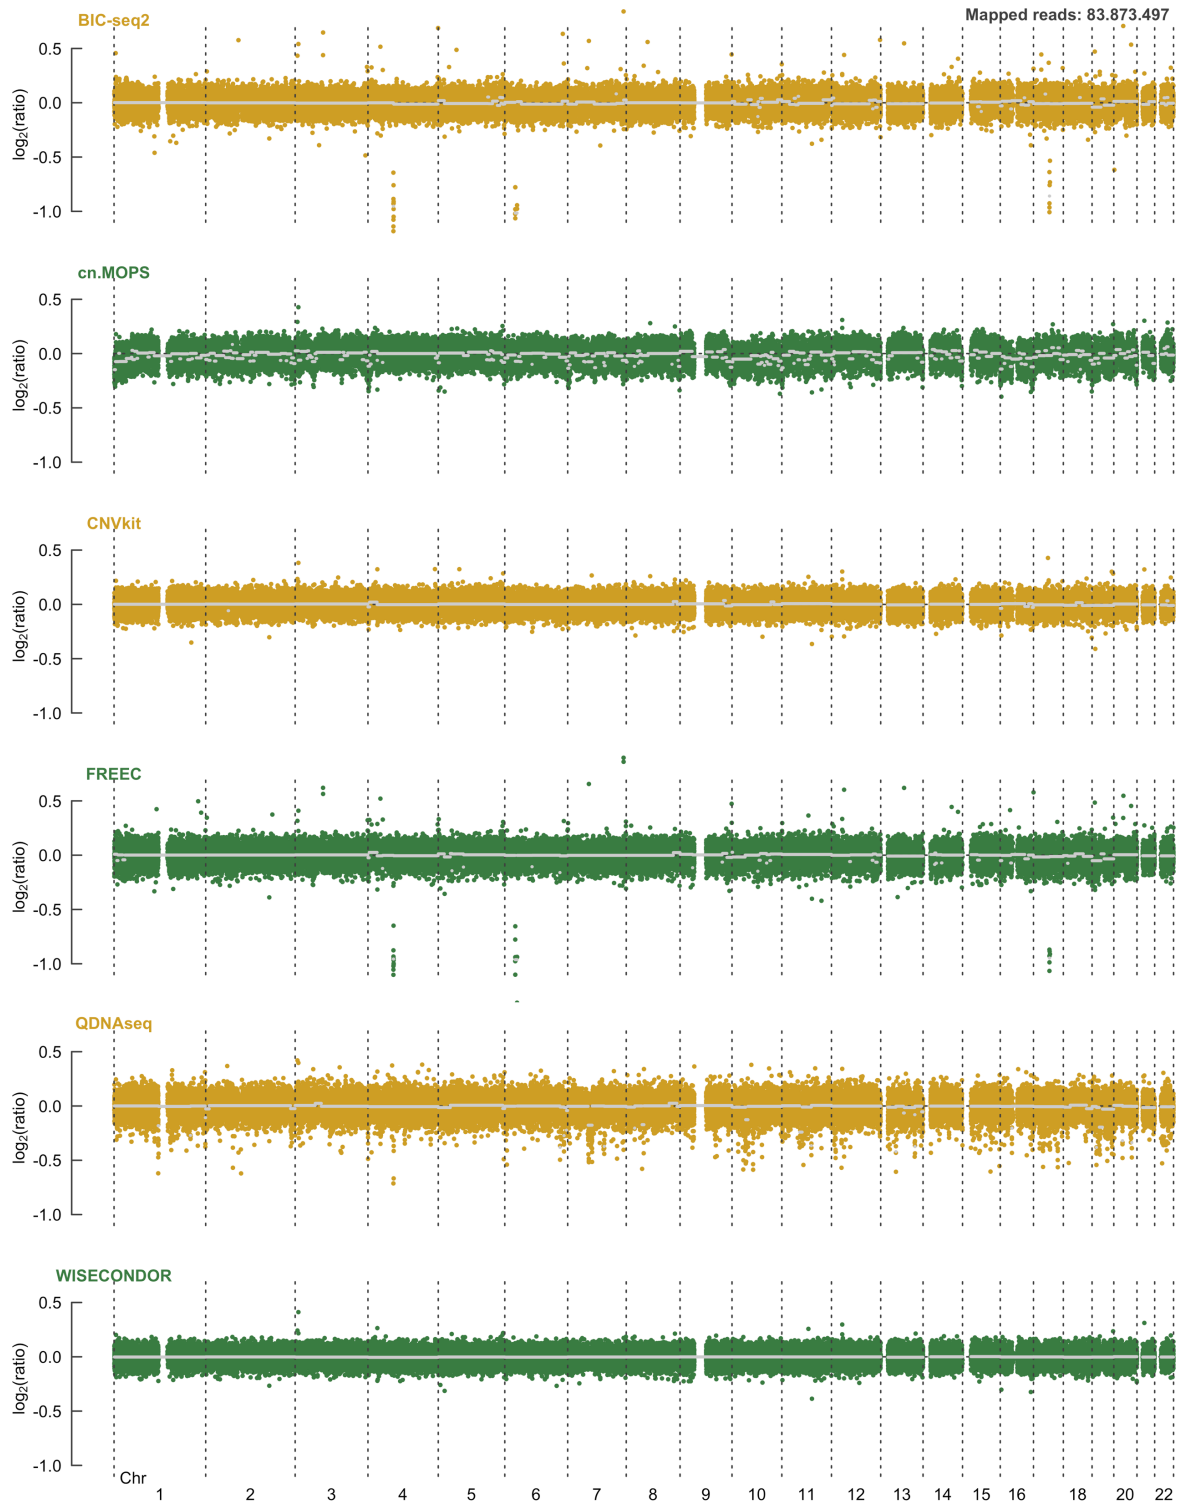

Figure S5. **Typical autosome-wide profiles for gDNA samples without validated variations.**

gDNA-5 is depicted. Note that narrow deviations seem to be present according to the reciprocity of some dots across all of the tools (e.g. the gain near the p-telomere of chromosome 3), as small aberrations are found naturally in every healthy individual. The reference-free tools hint towards novel larger aberrations (e.g. at chromosome 4, 6 and 17), which are likely false results, due to incorrect normalization.

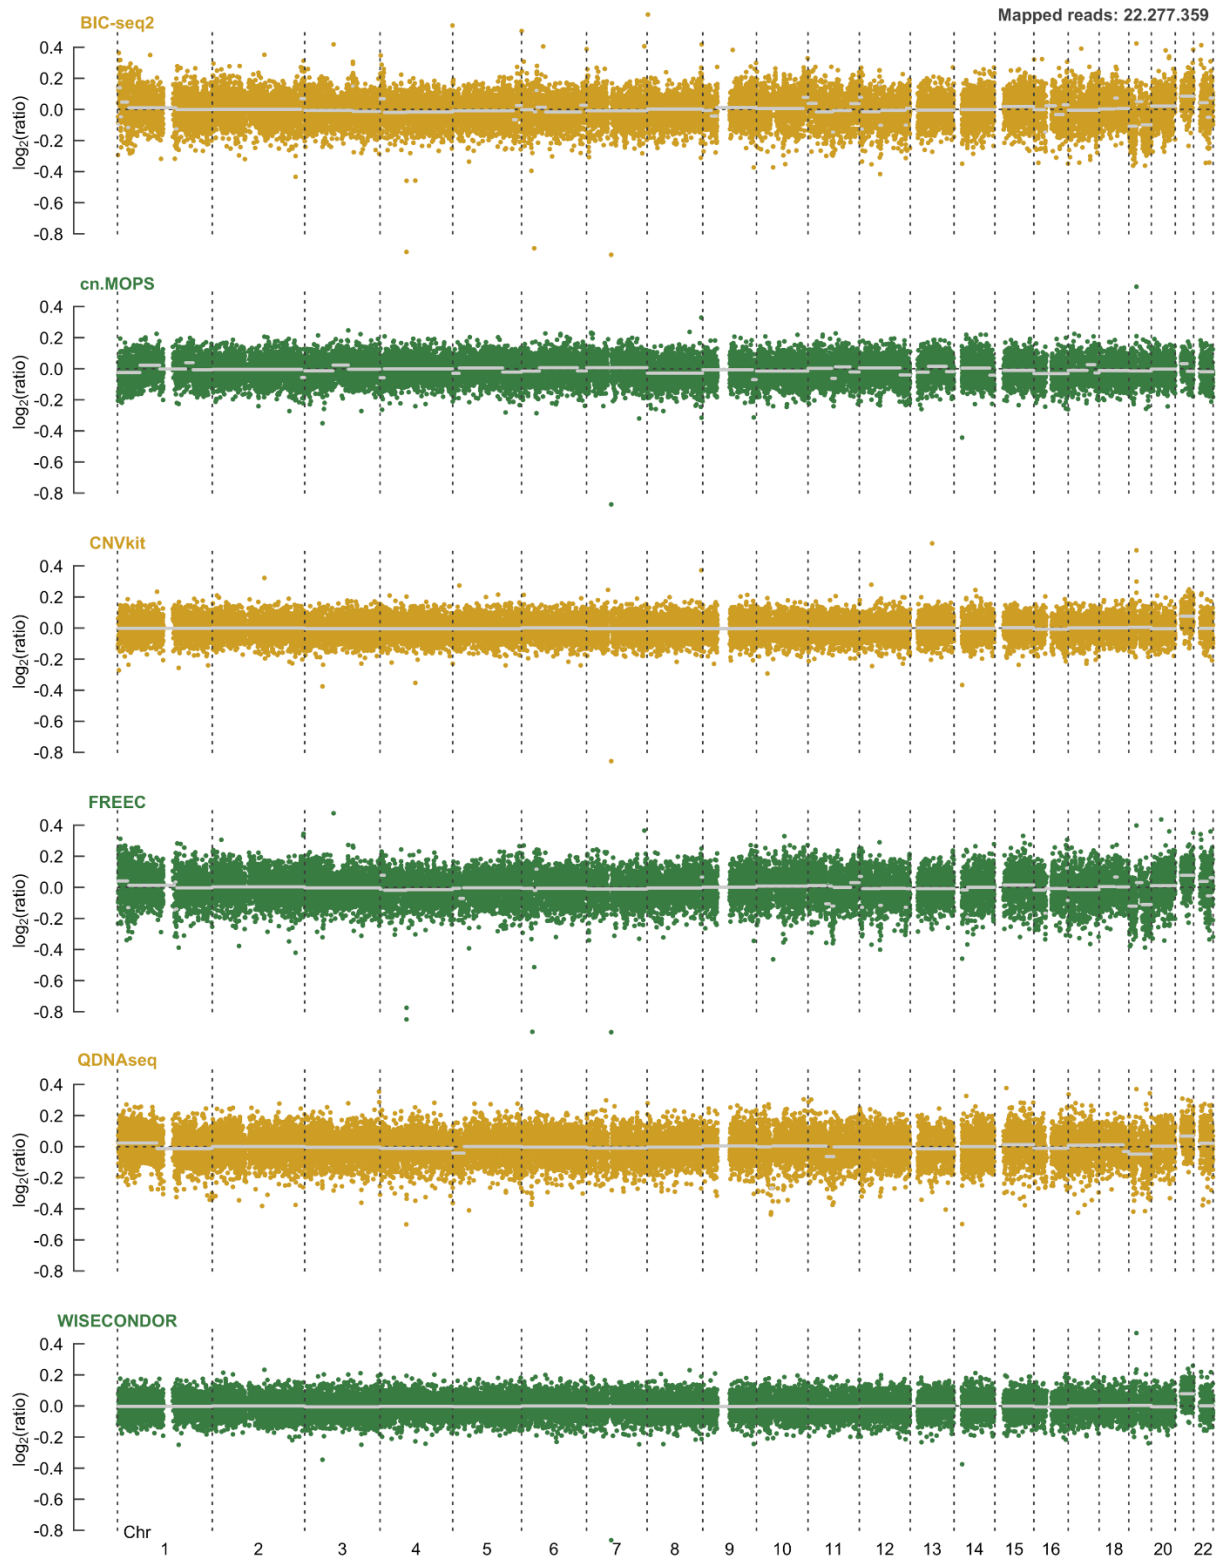

Figure S6. Typical autosome-wide profiles for a trisomy 21 NIPT sample.

NIPT-11 is depicted.

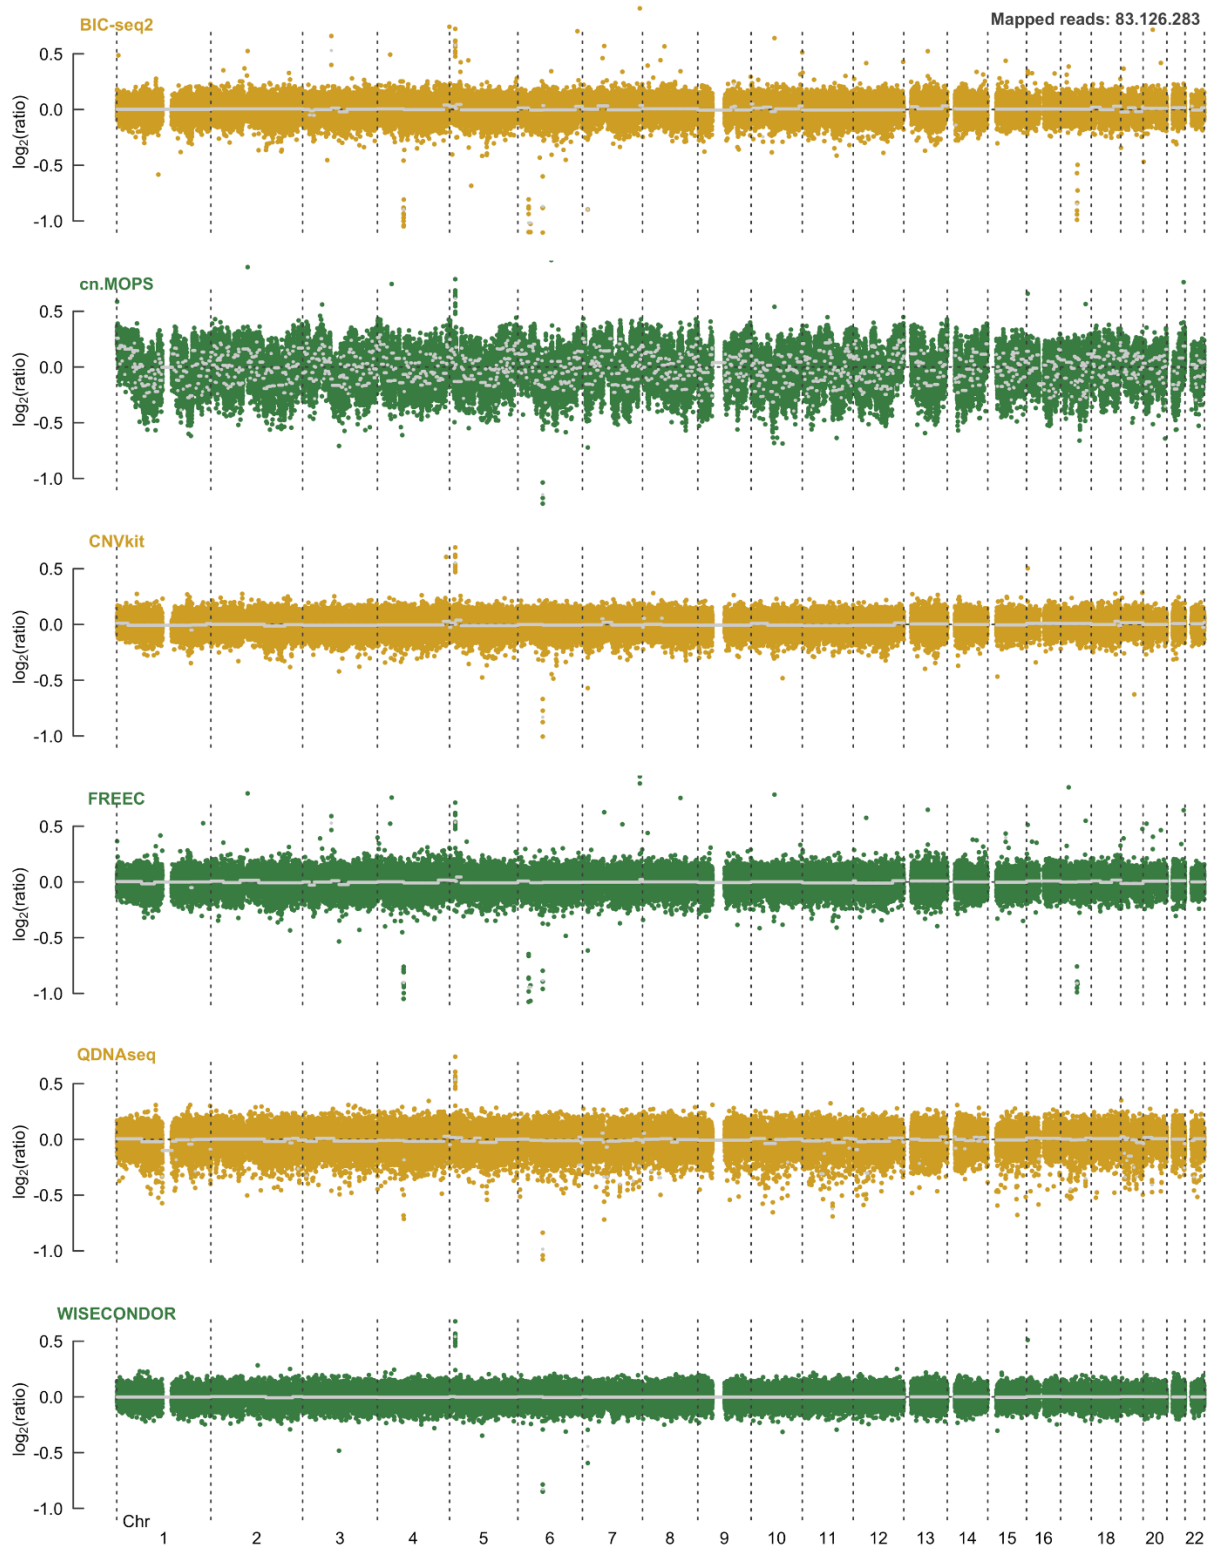

Figure S7. **Typical autosome-wide profiles for gDNA samples with validated variations.**

gDNA-13 is depicted. This sample has a validated duplication and deletion at chromosomes 5 and 6, respectively (Table S3).

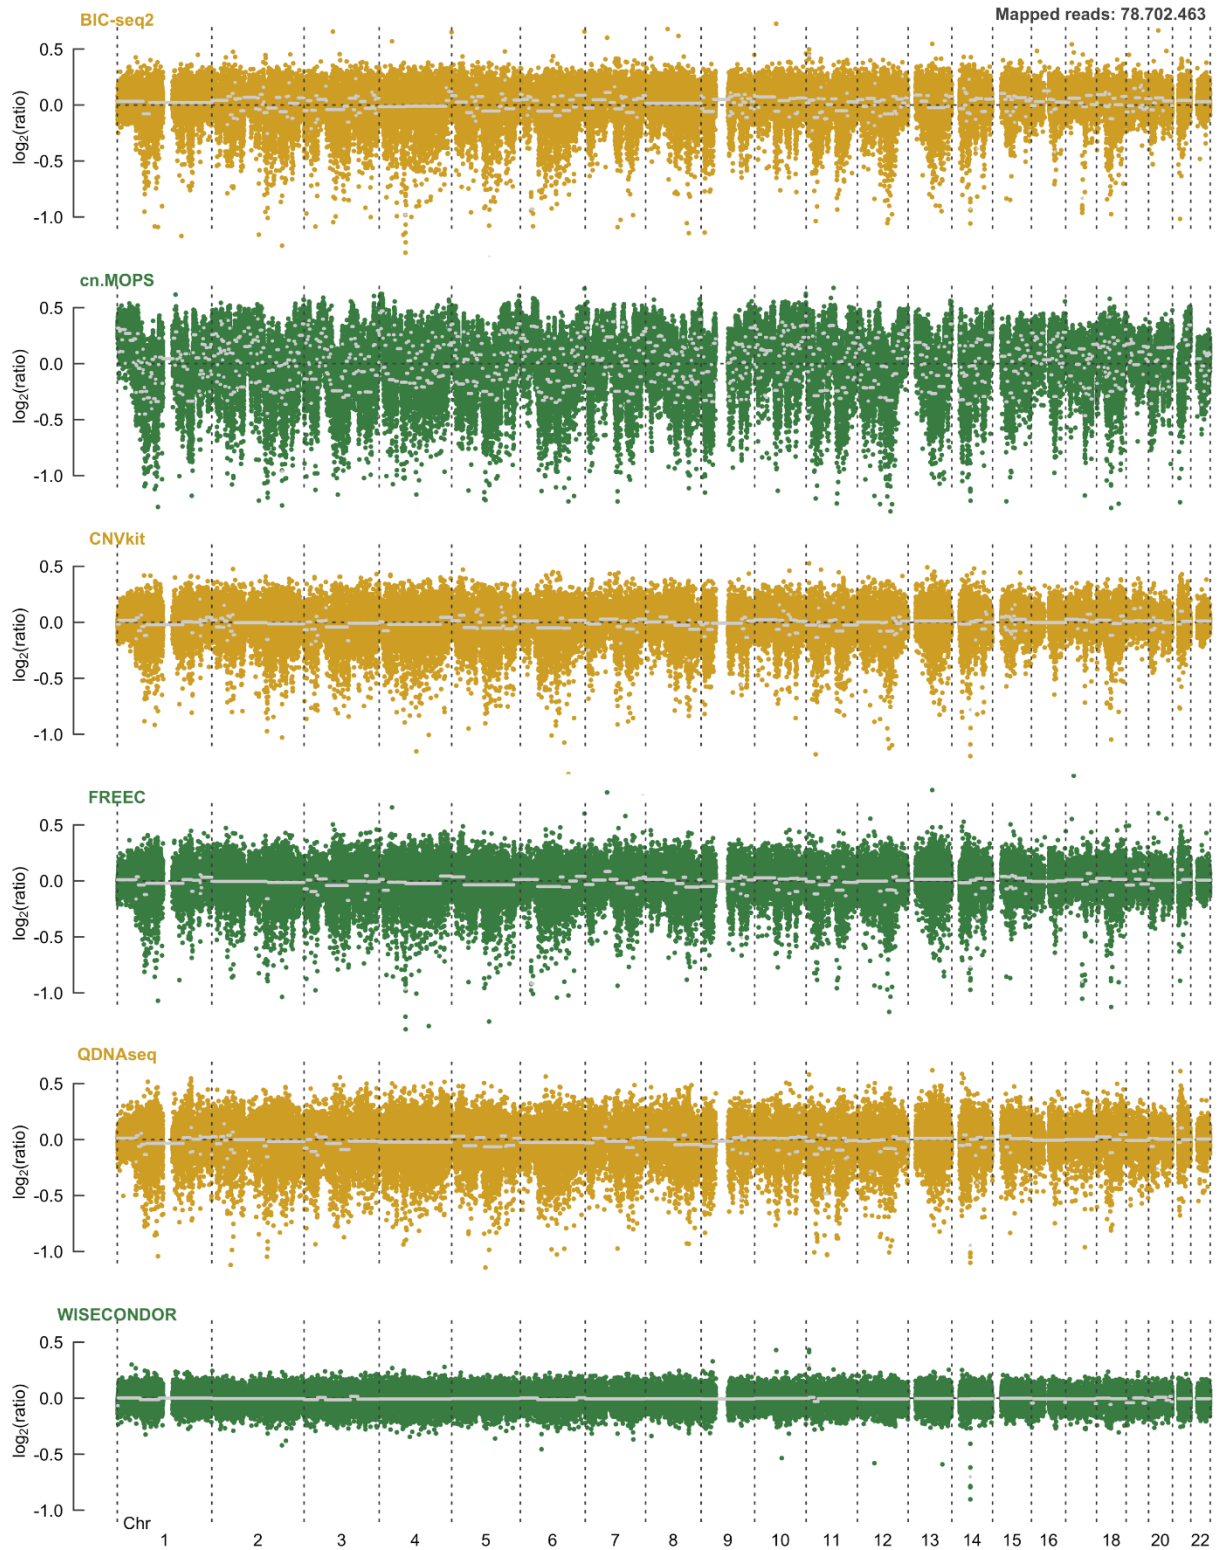

Figure S8. Autosome-wide profile comparison of problematic sample gDNA-3.

WISECONDOR is the only tool that seems to correctly normalize this sample.



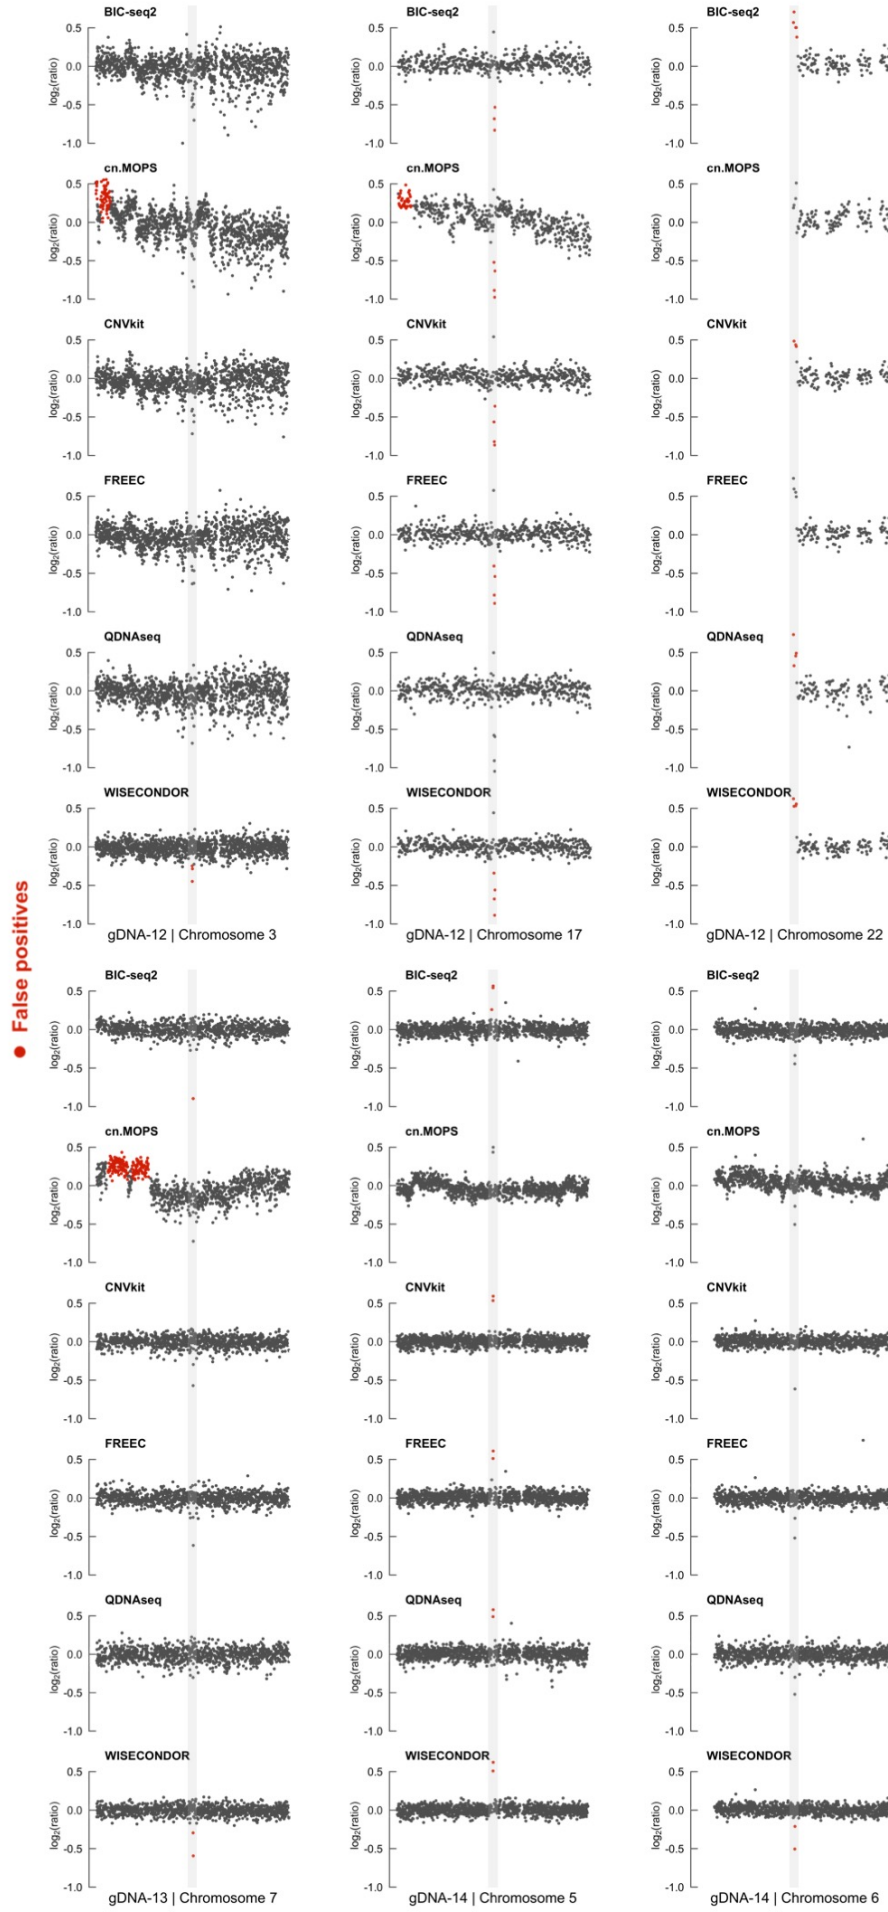

**Figure S9. Claimed false positives by WISECONDOR.**

The chromosomes are only partly visualized. WISECONDOR's false positives (6 in total) are positioned in the middle of each plot, additionally marked by transparent grey bars running across the tools. The reciprocity within these bars hints towards unannotated (mosaic) events rather than false positives. This was not observed in the far majority of false positives returned by other tools, unless for some 'deviations' exclusively returned by the reference-free tools.

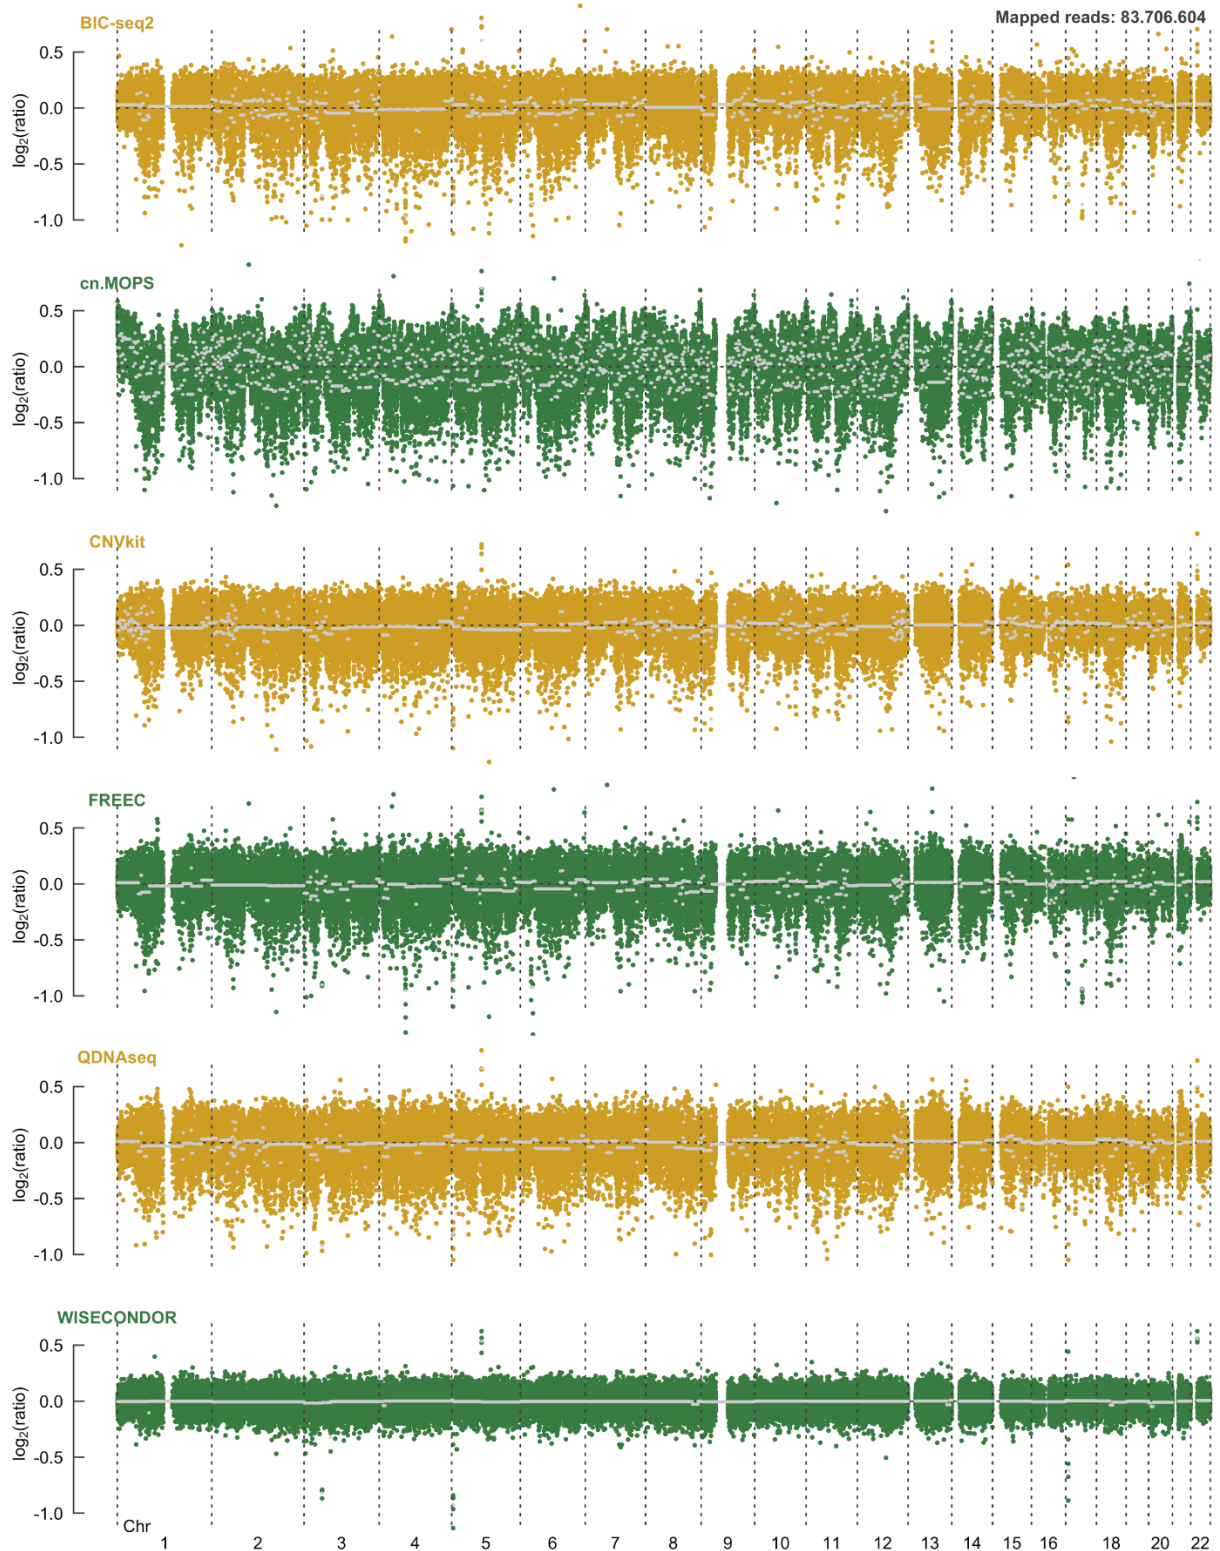

Figure S10. **Autosome-wide comparison of problematic sample gDNA-12.**

This sample has three validated aberrations in chromosomes 3 and 5 (Table S3). WISECONDOR is the only tool that seems to correctly normalize this sample.

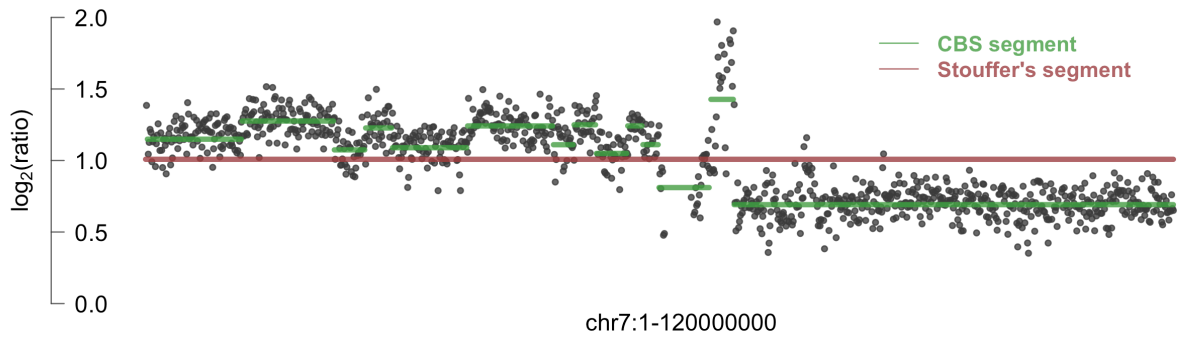

Figure S11. **Segmentation comparison between WISECONDOR and WisecondorX.**

This sample was not included in the validation set. It concerns a liquid biopsy from a patient with phase IV lung carcinoma. Note that chromosome 7, only partly represented, was subjected to numerous consecutive deletions and duplications finally resulting in a large gain with  $\log_2$  ratios centered around 1. The WISECONDOR algorithm (red) solely recognizes this segment as an amplification, yet does not further deal with the complex pattern. WisecondorX's CBS approach (green) however does not suffer this shortcoming.

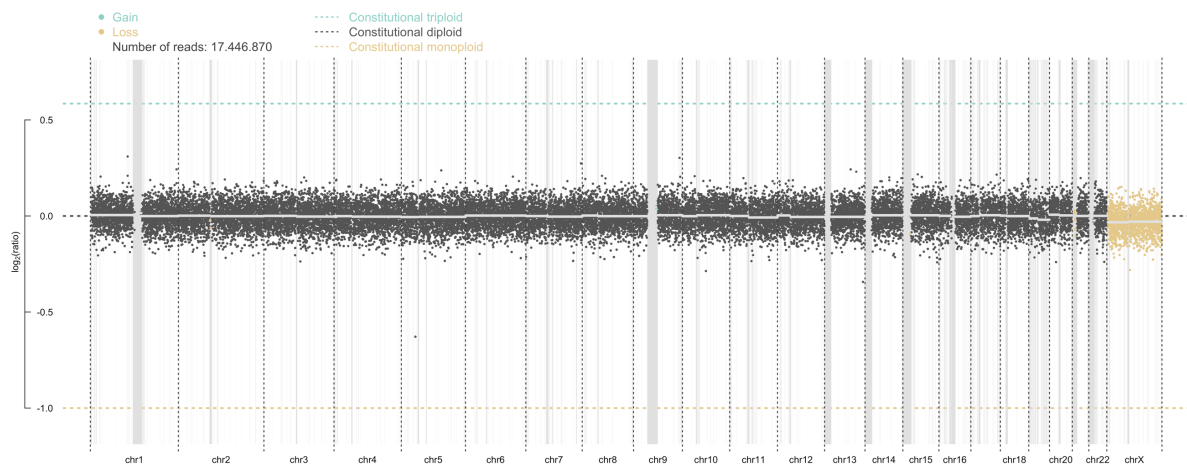

Figure S12. **Part of WisecondorX's genome-wide output for a fetus with monosomy X.**

WisecondorX shows a decreased value for the X-chromosome (NIPT-21), whilst few reads mapped the Y-chromosome (considered noise). Monosomy X was confirmed by chorionic villus sampling.

| Tool              | Publication                | Latest update | Main language | Version              | Uses non-paired reference set |
|-------------------|----------------------------|---------------|---------------|----------------------|-------------------------------|
| <b>BIC-seq2</b>   | Xi et al, 2016             | ?             | Perl          | v0.7 (norm v0.2.4)   | X                             |
| <b>cn.MOPS</b>    | Klambauer et al, 2012      | 2016          | R             | v1.24.0              | ✓                             |
| CNAnorm           | Gusnanto et al, 2012       | 2017          | R             |                      |                               |
| CNAseq            | Ivakhno et al, 2010        | ?             | R             |                      |                               |
| cnD               | Simpson et al, 2010        | 2012          | D             |                      |                               |
| CNV-seq           | Xie et al, 2009            | 2014          | Perl          |                      |                               |
| CNVeM             | Zwang et al, 2013          | ?             | C++           |                      |                               |
| CNVer             | Medvedev et al, 2010       | 2012          | C++           |                      |                               |
| <b>CNVkit</b>     | Talevich et al, 2016       | 2018          | Python        | v0.9.3               | ✓                             |
| CNVnator          | Abyzov et al, 2011         | 2017          | C++           |                      |                               |
| ERDS              | Zhu et al, 2012            | ?             | Perl          |                      |                               |
| <b>FREEC</b>      | Boeva et al, 2012          | 2017          | R             | v11                  | X                             |
| JointSLM          | Magi et al, 2011           | 2011          | R             |                      |                               |
| <b>QDNAseq</b>    | Scheinin et al, 2014       | 2017          | R             | v1.14.0              | X                             |
| RDXplorer         | Zhao et al, 2009           | 2011          | Python        |                      |                               |
| readDepth         | Miller et al, 2011         | 2016          | R             |                      |                               |
| seqCNA            | Mosen-Ansorena et al, 2014 | 2017          | R             |                      |                               |
| SegSeq            | Chiang et al, 2009         | 2009          | MATLAB        |                      |                               |
| <b>WISECONDOR</b> | Straver et al, 2014        | 2017          | Python        | Github master branch | ✓                             |

Table S1. **Depth of coverage WGS tools selected for the comparative analysis.**

The final selection, marked in bold, was based on a combination of a tool's latest update, assumed diagnostic ability, popularity and distinct properties. This resulted in three software that require healthy reference samples, and three that do not.

| Type | Reference   |                  | Cases                         |                            |                           |
|------|-------------|------------------|-------------------------------|----------------------------|---------------------------|
|      | Samples (n) | Mapped reads (M) | Without known aberrations (n) | With known Aberrations (n) | Analysis at bin size (kb) |
| NIPT | 50          | 22.8 ± 1.7       | 10                            | 15                         | 100                       |
| gDNA | 50          | 86.5 ± 15.7      | 10                            | 5                          | 30                        |

Table S2. **Samples used in the comparative study.**

Since some tools require healthy reference samples, fifty were selected per type of analysis. Furthermore, a set of twenty test cases with proven aberrations (Table S3) and a second equally-sized set without variations were selected for the actual comparative analysis, where the bin size was set according to the number of mapped reads in the reference sets – this to obtain similar Gaussian noise levels.



| Sample ID                               | Source         | FF (%) | Aberration                   | Validation                                         |
|-----------------------------------------|----------------|--------|------------------------------|----------------------------------------------------|
| <b>Chromosomal aberrations</b>          |                |        |                              |                                                    |
| NIPT-11                                 | Fetal          | 8.2%   | Trisomy 21                   | Confirmed by AC                                    |
| NIPT-12                                 | Fetal          | 7.2%   | Trisomy 21                   | Blood redraw followed by NIPT sWGS                 |
| NIPT-13                                 | Fetal          | 12.2%  | Trisomy 21                   | Confirmed on fetal biopsy by sWGS                  |
| NIPT-14                                 | Fetal          | 14.6%  | Trisomy 21                   | Confirmed by AC                                    |
| NIPT-15                                 | Placental      | 8.1%   | Trisomy 9                    | Not confirmed by AC                                |
| NIPT-15                                 | Fetal          | 8.1%   | Trisomy 21                   | Confirmed by AC                                    |
| NIPT-16                                 | Fetal          | 18.8%  | Trisomy 21                   | Confirmed by CVS & ultrasound irregularity         |
| NIPT-17                                 | Placental      | 9.5%   | Trisomy 14                   | Not confirmed by AC                                |
| NIPT-18                                 | Placental      | 24.3%  | Trisomy 20                   | Not confirmed by AC                                |
| NIPT-19                                 | Placental      | 9.6%   | Trisomy 16                   | Confirmed mosaic T16 on placental biopsy by sWGS   |
| NIPT-20                                 | Placental      | 18.1%  | Trisomy 3                    | Not confirmed by AC                                |
| NIPT-20                                 | Placental      | 18.1%  | Trisomy 18                   | Not confirmed by AC                                |
| NIPT-21                                 | Fetal          | 5.1%   | Monosomy X                   | Confirmed by CVS & ultrasound irregularity         |
| <b>Large subchromosomal aberrations</b> |                |        |                              |                                                    |
| NIPT-22                                 | Maternal       | 7.1%   | 18q11.2 (+)                  | Confirmed by sWGS on maternal lymphocyte DNA       |
| NIPT-23                                 | Fetal          | 12%    | 18p11 (+); isochromosome     | Confirmed by AC & postnatal sWGS on lymphocyte DNA |
| NIPT-24                                 | Fetal          | 15.8%  | 5p15.5-5p13.2 (+)            | Confirmed by AC                                    |
| NIPT-25                                 | Fetal          | 23.4%  | 22q11.21 (-)                 | Confirmed by AC                                    |
| <b>Small subchromosomal aberrations</b> |                |        |                              |                                                    |
| gDNA-11                                 | Constitutional | N/A    | chr9:26265001-26430000 (-)   | Trio analysis – paternal origin                    |
| gDNA-11                                 | Constitutional | N/A    | chr17:3510001-3555000 (-)    | Trio analysis – maternal origin                    |
| gDNA-12                                 | Constitutional | N/A    | chr3:47550001-47640000 (-)   | Trio analysis – <i>de novo</i> origin              |
| gDNA-12                                 | Constitutional | N/A    | chr5:3675001-3885000 (-)     | Trio analysis – maternal origin                    |
| gDNA-12                                 | Constitutional | N/A    | chr5:78750001-78855000 (+)   | Trio analysis – maternal origin                    |
| gDNA-13                                 | Constitutional | N/A    | chr5:14880001-15195000 (+)   | Trio analysis – paternal origin                    |
| gDNA-13                                 | Constitutional | N/A    | chr6:65805001-65925000 (-)   | Trio analysis – maternal origin                    |
| gDNA-14                                 | Constitutional | N/A    | chr2:44505001-44580000 (-)   | Trio analysis – maternal origin                    |
| gDNA-14                                 | Constitutional | N/A    | chr7:146250001-146685000 (-) | Trio analysis – paternal origin                    |
| gDNA-14                                 | Constitutional | N/A    | chr12:85455001-85545000 (+)  | Trio analysis – paternal origin                    |
| gDNA-15                                 | Constitutional | N/A    | chr2:112650001-112740000 (-) | Trio analysis – maternal origin                    |

Table S3. **Used case samples with validated aberrations.**

In total, thirteen chromosomal, four large and eleven small subchromosomal variations were included across fifteen NIPT and five gDNA samples with validated aberrations. NIPT validation was mostly performed by amniocentesis and chorionic villus sampling whilst gDNA aberrations were discovered and confirmed by trio analysis. *De novo* annotations could be assigned if they were supported by phenotype. Abbreviations: sWGS = shallow whole-genome sequencing; FF = fetal fraction; AC = amniocentesis; CVS = chorionic villus sampling; (+) = gain; (-) = loss.
